# Supplementary material for: Mediterranean Diet, a Posteriori Dietary Patterns, Time-Related Meal Patterns and Adiposity: Results from a Cross-Sectional Study in University Students
Source: MDPI journal article supplement (doi:10.3390/diseases10030064), 2022-09-11
Supplement: s1 [file s1]

Supplementary Table S2: Component loadings derived using Principal Component Analysis for the identification of time- related meal patterns.

|                              | <i>Early eaters</i> | <i>Medium eaters</i> | <i>Late eaters</i> |
|------------------------------|---------------------|----------------------|--------------------|
| <b>Breakfast</b>             | <b>0.726</b>        | 0.344                | -0.341             |
| <b>Snack</b>                 | <b>0.811</b>        | -0.037               | 0.207              |
| <b>Meal</b>                  | -0.007              | <b>0.817</b>         | -0.078             |
| <b>Afternoon snack</b>       | <b>0.720</b>        | -0.063               | 0.346              |
| <b>Dinner</b>                | 0.073               | <b>0.672</b>         | 0.407              |
| <b>Bedtime snack</b>         | 0.187               | 0.103                | <b>0.869</b>       |
| <b>% Cumulative variance</b> | 33.7                | 53.07                | 70.0               |

Higher absolute values of the loadings indicate that the meal is correlated with the respective component. Numbers in bold indicate absolute loadings greater than 0.45.
