# Supplementary material for: Mediterranean Diet, a Posteriori Dietary Patterns, Time-Related Meal Patterns and Adiposity: Results from a Cross-Sectional Study in University Students
Source: MDPI journal article supplement (doi:10.3390/diseases10030064), 2022-09-11
Supplement: s1 [file s1]

Supplementary Table S1: Component loadings derived using Principal Component Analysis for the identification of dietary patterns.

|                                        | 1            | 2            | 3            | 4            | 5            | 6            |
|----------------------------------------|--------------|--------------|--------------|--------------|--------------|--------------|
| <b>Juices</b>                          | 0.307        | <b>0.810</b> | 0.050        | 0.011        | 0.052        | -0.047       |
| <b>Sodas</b>                           | -0.161       | <b>0.662</b> | 0.062        | 0.156        | 0.044        | 0.153        |
| <b>Liquid calories</b>                 | 0.151        | <b>0.954</b> | 0.081        | 0.068        | 0.077        | 0.053        |
| <b>Alcoholic drinks</b>                | -0.068       | 0.103        | 0.003        | 0.190        | <b>0.722</b> | 0.132        |
| <b>Total dairy</b>                     | <b>0.457</b> | 0.168        | 0.122        | 0.213        | <b>0.624</b> | 0.048        |
| <b>Vegetables</b>                      | <b>0.735</b> | -0.099       | 0.205        | -0.063       | 0.036        | 0.066        |
| <b>Legumes</b>                         | <b>0.481</b> | 0.110        | 0.344        | 0.153        | -0.071       | -0.215       |
| <b>Eggs</b>                            | 0.232        | 0.024        | 0.110        | 0.297        | <b>0.573</b> | -0.140       |
| <b>Meats</b>                           | -0.024       | 0.177        | 0.062        | <b>0.697</b> | 0.256        | 0.323        |
| <b>Poultry</b>                         | -0.071       | 0.159        | 0.059        | <b>0.623</b> | 0.176        | 0.374        |
| <b>Fish and seafoods</b>               | 0.009        | -0.004       | 0.026        | <b>0.850</b> | 0.046        | -0.022       |
| <b>Refined grains</b>                  | 0.263        | 0.251        | 0.353        | 0.275        | 0.238        | 0.396        |
| <b>Whole grains</b>                    | <b>0.538</b> | 0.144        | 0.047        | -0.017       | 0.369        | 0.051        |
| <b>Fruits</b>                          | <b>0.765</b> | 0.023        | -0.031       | -0.019       | -0.082       | 0.047        |
| <b>Other fats</b>                      | -0.088       | 0.106        | <b>0.743</b> | -0.092       | 0.364        | 0.292        |
| <b>Olive oil</b>                       | 0.176        | -0.006       | <b>0.649</b> | 0.208        | -0.418       | -0.136       |
| <b>Total fats</b>                      | 0.017        | 0.085        | <b>0.951</b> | 0.030        | 0.088        | 0.173        |
| <b>Tea</b>                             | <b>0.466</b> | 0.123        | -0.152       | -0.014       | 0.104        | 0.036        |
| <b>Coffee</b>                          | -0.028       | -0.140       | -0.024       | -0.212       | 0.351        | 0.296        |
| <b>Nuts</b>                            | 0.243        | -0.210       | -0.025       | 0.219        | 0.007        | 0.417        |
| <b>Fast foods</b>                      | -0.049       | 0.099        | 0.050        | 0.188        | -0.060       | <b>0.765</b> |
| <b>Sweets (incl. honey/marmalade)</b>  | 0.060        | 0.233        | 0.299        | 0.040        | 0.219        | <b>0.670</b> |
| <b>% Cumulative variance explained</b> | 21.4         | 31.9         | 40.5         | 48.6         | 55.0         | 60.1         |

Higher absolute values of the loadings indicate that the meal is correlated with the respective component. Numbers in bold indicate absolute loadings greater than 0.45.

Pattern 1: legumes, vegetables, fruits, tea, dairy, whole grains

Pattern 2: Juices, sodas, liquid calories

Pattern 3: olive oil, fats

Pattern 4: meat, poultry, fish

Pattern 5: alcohol, eggs, total dairy

Pattern 6: fast foods, total sweets
